# Supplementary material
Source: PubMed Central journal article supplement (PMC8491680)
Supplement: supplementary_figures_bhab129.pdf [file supplementary_figures_bhab129.pdf]

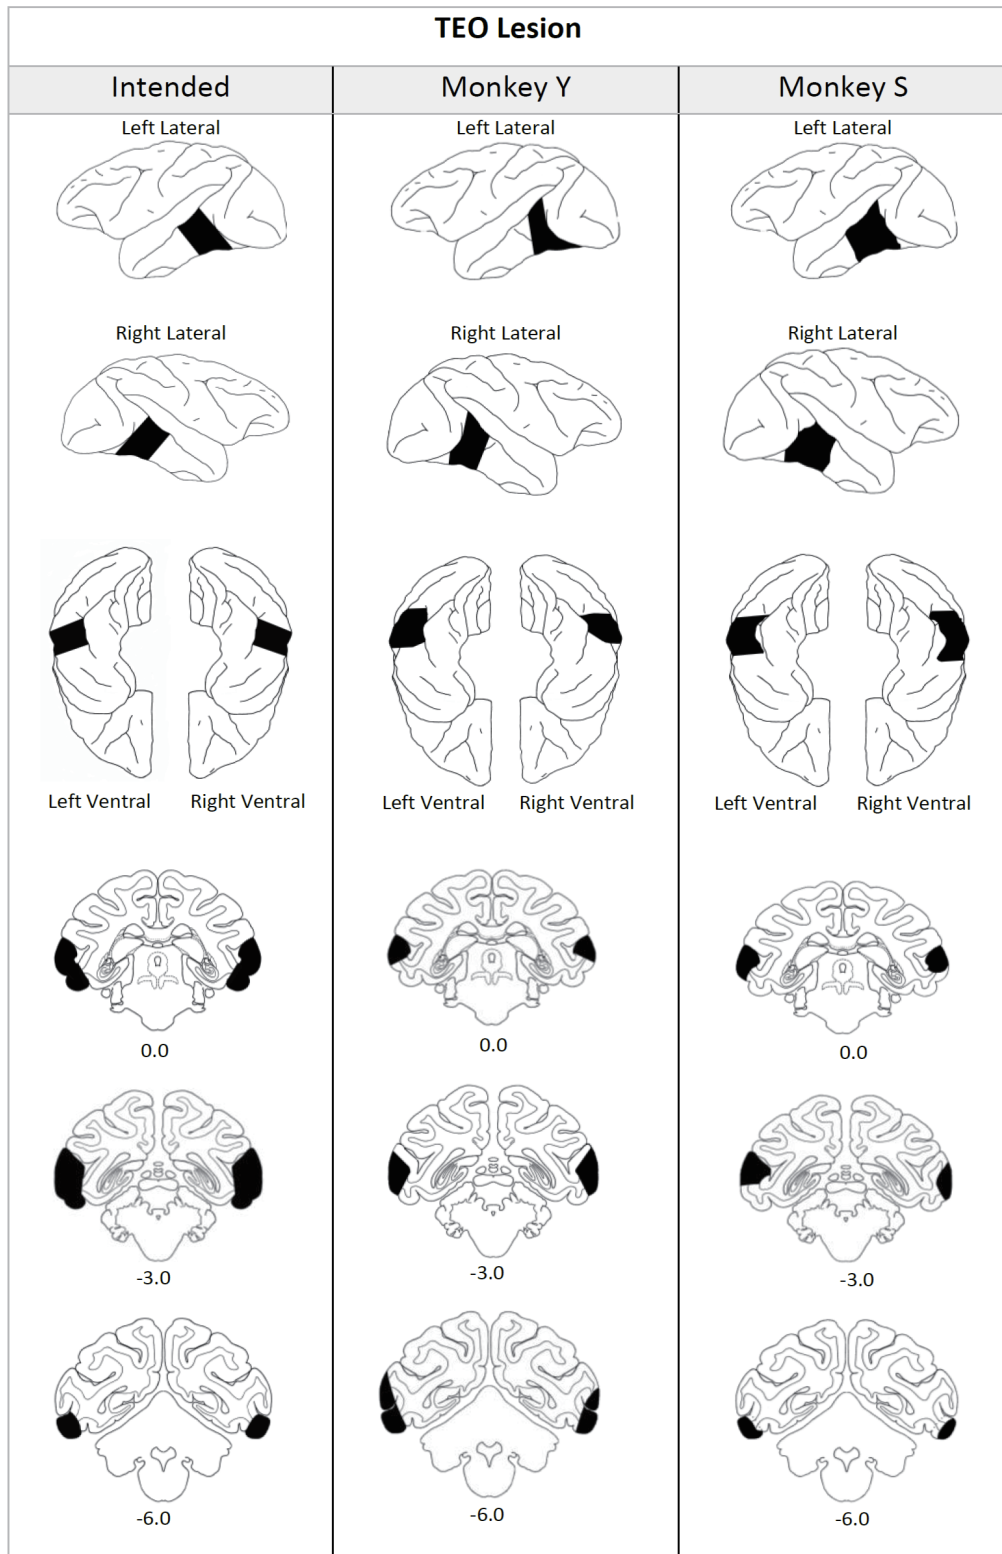

**Supplementary Figure 1.** Lesion reconstructions from thionin-stained sections for the monkeys with TEO removals.

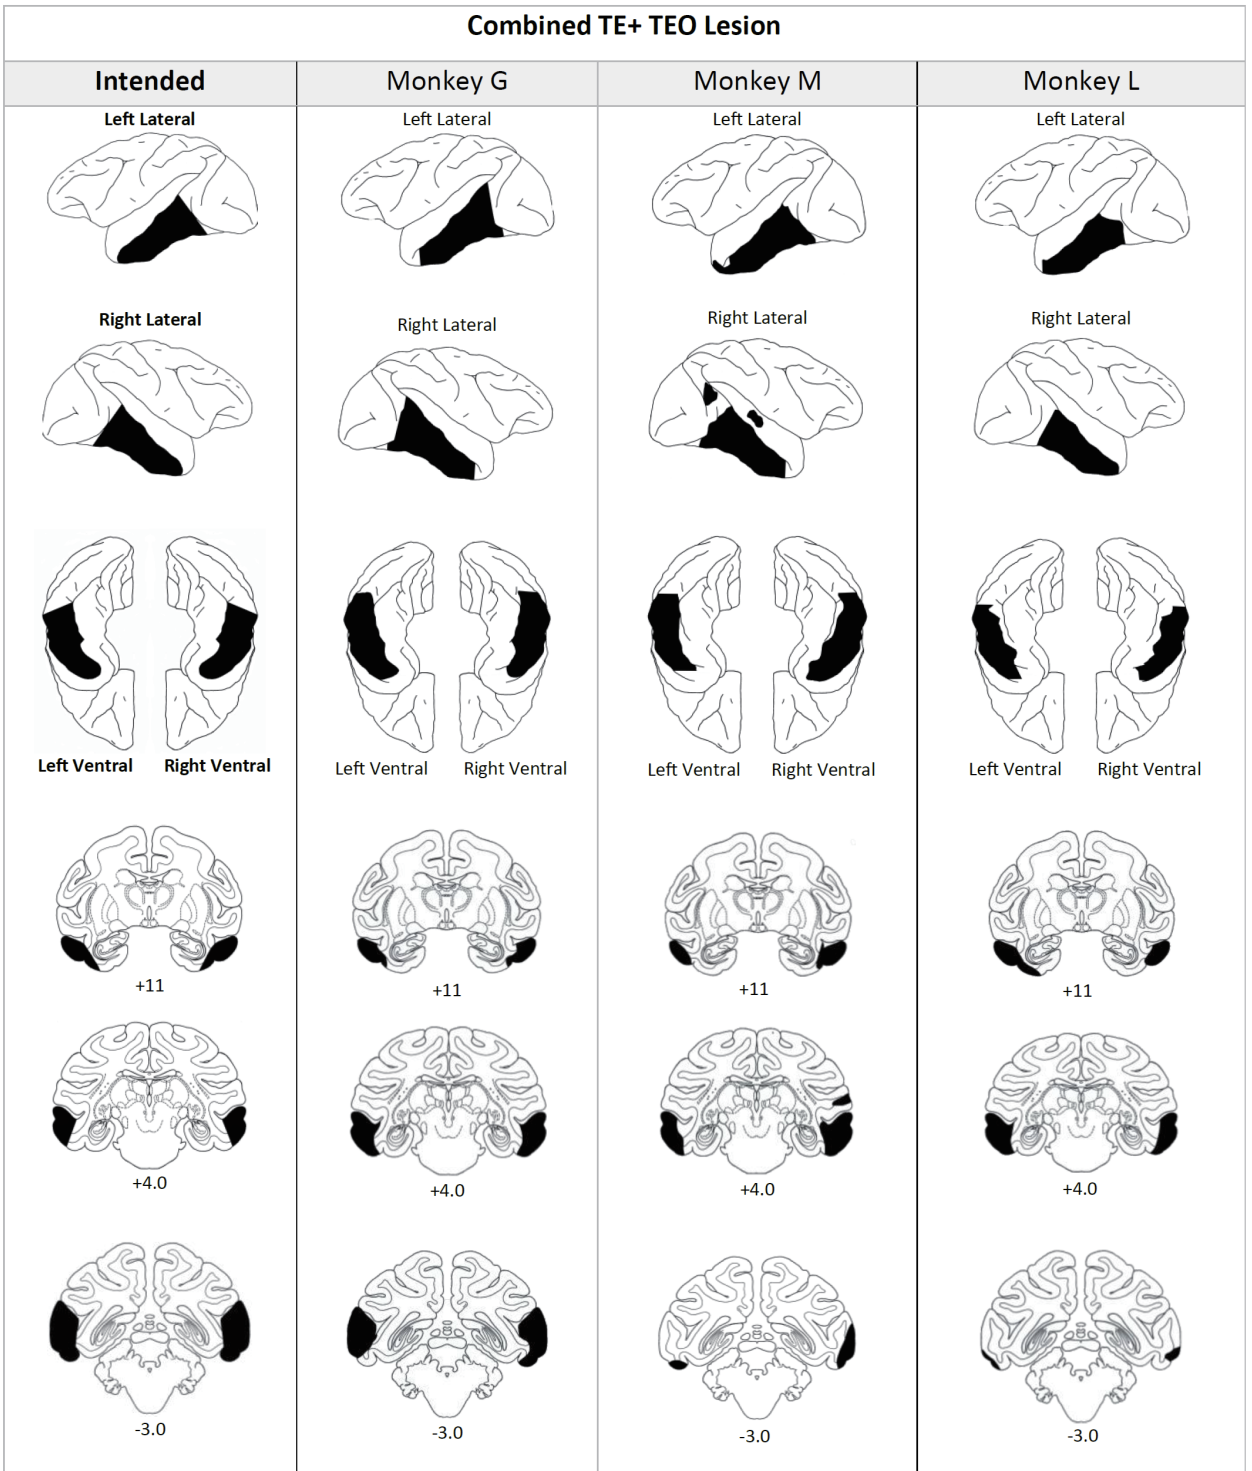

**Supplementary Figure 2.** Lesion reconstructions from thionin-stained sections for the monkeys with TE+TEO removals.

**a**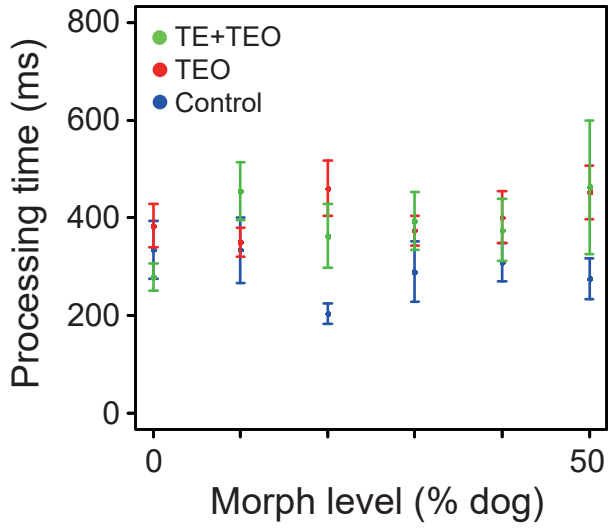**b**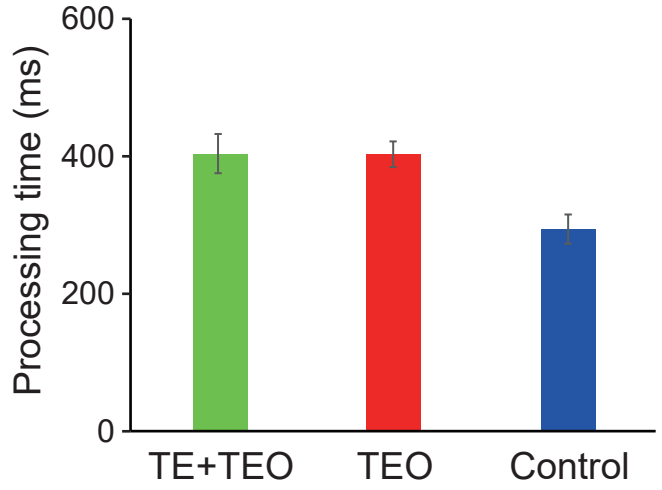

**Supplementary Figure 3.** The processing time of all monkeys in the trial-unique task (1 day).  
(b) The average processing time in each lesion group. Error bar: SEM.
